# Supplementary material for: Deletion of Macrophage-Specific Glycogen Synthase Kinase (GSK)-3α Promotes Atherosclerotic Regression in Ldlr−/− Mice
Source: MDPI journal article supplement (doi:10.3390/ijms23169293), 2022-08-18
Supplement: s1 [file s1]

## Supplementary Material

### 1 Supplementary Data

#### Animals (in vivo studies)

| Species | Vendor or Source | Background Strain | Sex |
|---------|------------------|-------------------|-----|
| Mice    | In House         | C57               | M   |
| Mice    | In House         | C57               | F   |

#### Genetically Modified Animals

| Background Strain | Strain                | Genotype                                                                                                                                                |
|-------------------|-----------------------|---------------------------------------------------------------------------------------------------------------------------------------------------------|
| C57BL/6J          | Li $\alpha$ KO        | <i>Ldlr</i> <sup>-/-</sup> <i>GSK3<math>\alpha</math></i> <sup>fl/fl</sup> <i>CsfiCre</i> <sup>+/-</sup>                                                |
|                   | Li $\beta$ KO         | <i>Ldlr</i> <sup>-/-</sup> <i>GSK3<math>\beta</math></i> <sup>fl/fl</sup> <i>CsfiCre</i> <sup>+/-</sup>                                                 |
|                   | Li $\alpha\beta$ KO   | <i>Ldlr</i> <sup>-/-</sup> <i>GSK3<math>\alpha</math></i> <sup>fl/fl</sup> <i>GSK3<math>\beta</math></i> <sup>fl/fl</sup> <i>CsfiCre</i> <sup>+/-</sup> |
|                   | L $\alpha$ fl/fl      | <i>Ldlr</i> <sup>-/-</sup> <i>GSK3<math>\alpha</math></i> <sup>fl/fl</sup>                                                                              |
|                   | L $\beta$ fl/fl       | <i>Ldlr</i> <sup>-/-</sup> <i>GSK3<math>\beta</math></i> <sup>fl/fl</sup>                                                                               |
|                   | L $\alpha\beta$ fl/fl | <i>Ldlr</i> <sup>-/-</sup> <i>GSK3<math>\alpha</math></i> <sup>fl/fl</sup> <i>GSK3<math>\beta</math></i> <sup>fl/fl</sup>                               |

#### Antibodies

| Target antigen       | Vendor or Source        | Working concentration |
|----------------------|-------------------------|-----------------------|
| GSK-3 $\alpha/\beta$ | Cell signaling          | 1:1000                |
| GSK-3 $\beta$        | Cell signaling          | 1:1000                |
| $\beta$ -Actin       | SIGMA                   | 1:3000                |
| CD107b(Mac3)         | BD Transductions        | 1:50                  |
| CD68                 | Thermofisher Scientific | 1:100                 |
| $\alpha$ -actin      | Santa Cruz              | 1:100                 |
| NFK $\beta$ p65      | Santa Cruz              | 1:50                  |
| IL-1 $\beta$         | Invitrogen              | 1:100                 |
| NLRP3                | Invitrogen              | 1:100                 |
| CCR7                 | Abcam                   | 1:100                 |
| ABCA1                | NOVUS                   | 1:100                 |

## 2 Supplementary Figures and Tables

**Supplementary Table S1. Metabolic Parameters of female mice**

|                                  | Baseline         | Neg Control         | LiαKO               |                     | LiβKO               |                     | LiαβKO              |                     |
|----------------------------------|------------------|---------------------|---------------------|---------------------|---------------------|---------------------|---------------------|---------------------|
|                                  |                  |                     | Tam-                | Tam+                | Tam-                | Tam+                | Tam-                | Tam+                |
| Fasting Plasma Concentration, mM |                  |                     |                     |                     |                     |                     |                     |                     |
| Cholesterol                      | 10.65<br>± 0.511 | 5.89<br>± 0.274**** | 5.55<br>± 0.190**** | 5.24<br>± 0.228**** | 6.21<br>± 0.467**** | 5.58<br>± 0.249**** | 5.69<br>± 0.227**** | 5.25<br>± 0.212**** |
| Triglyceride                     | 2.71<br>± 0.185  | 0.73<br>± 0.052**** | 0.52<br>± 0.033**** | 0.57<br>± 0.046**** | 0.87<br>± 0.089**** | 0.86<br>± 0.060**** | 0.90<br>± 0.064**** | 0.61<br>± 0.037**** |
| Blood Glucose, mM                | 11.28 ± 0.86     | 9.66 ± 0.43         | 9.53 ± 0.25         | 9.97 ± 0.51         | 11.05 ± 0.43        | 10.97 ± 0.33        | 9.35 ± 0.20         | 9.28 ± 0.38         |
| Body weight, g                   | 27.12 ± 1.24     | 29.73 ± 1.62        | 25.43 ± 1.06        | 25.11 ± 0.48        | 33.11 ± 1.74        | 29.00 ± 1.26        | 31.73 ± 1/06        | 27.51 ± 0.08        |
| Liver weight, g                  | 1.37 ± 0.11      | 1.20 ± 0.07         | 1.09 ± 0.04         | 1.02 ± 0.03         | 1.23 ± 0.06         | 1.10 ± 0.05         | 1.23 ± 0.04         | 1.10 ± 0.04         |
| Adipose weight, g                | 0.49 ± 0.11      | 1.20 ± 0.21##       | 0.43 ± 0.08         | 0.19 ± 0.03##       | 1.40 ± 0.30         | 0.56 ± 0.12##       | 0.77 ± 0.16         | 0.30 ± 0.07##       |
| Heart weight, g                  | 0.14 ± 0.005     | 0.14 ± 0.004        | 0.16 ± 0.003        | 0.14 ± 0.003        | 0.14 ± 0.003        | 0.13 ± 0.003        | 0.15 ± 0.005        | 0.15 ± 0.005        |

Females, n=10-13 per group, \*, in compare to baseline group #, in compare to non tamoxifen treated group

**Supplementary Table S2. Metabolic Parameters of male mice**

|                                  | Baseline        | Neg Control        | LiαKO               |                     | LiβKO               |                  | LiαβKO              |                     |
|----------------------------------|-----------------|--------------------|---------------------|---------------------|---------------------|------------------|---------------------|---------------------|
|                                  |                 |                    | Tam-                | Tam+                | Tam-                | Tam+             | Tam-                | Tam+                |
| Fasting Plasma Concentration, mM |                 |                    |                     |                     |                     |                  |                     |                     |
| Cholesterol                      | 8.26<br>± 0.321 | 6.65<br>± 0.387*   | 4.79<br>± 0.205**** | 4.83<br>± 0.221**** | 6.28<br>± 0.130**   | 6.80<br>± 0.139* | 5.33<br>± 0.411**** | 5.73<br>± 0.286**** |
| Triglyceride                     | 2.35<br>± 0.270 | 1.46<br>± 0.185*** | 0.72<br>± 0.047**** | 0.71<br>± 0.055**** | 1.23<br>± 0.066**** | 1.67<br>± 0.089* | 0.93<br>± 0.106**** | 1.03<br>± 0.093**** |
| Blood Glucose, mM                | 11.18 ± 0.84    | 12.23 ± 0.70       | 9.79 ± 0.54         | 10.59 ± 0.36        | 11.51 ± 0.61        | 13.32 ± 0.57     | 10.67 ± 0.55        | 12.52 ± 0.37        |
| Body weight, g                   | 35.78 ± 1.48    | 43.57 ± 2.93       | 31.50 ± 0.89        | 31.26 ± 0.96        | 43.28 ± 2.50        | 43.18 ± 1.39     | 35.99 ± 1.02        | 35.60 ± 1.14        |
| Liver weight, g                  | 1.74 ± 0.12     | 1.96 ± 0.17        | 1.45 ± 0.07         | 1.44 ± 0.05         | 2.00 ± 0.25         | 2.05 ± 0.10      | 1.47 ± 0.08         | 1.61 ± 0.07         |
| Adipose weight, g                | 1.19 ± 0.21     | 1.75 ± 0.30        | 0.37 ± 0.05         | 0.50 ± 0.05         | 1.92 ± 0.19         | 2.23 ± 0.14      | 0.80 ± 0.16         | 0.87 ± 0.12         |
| Heart weight, g                  | 0.19 ± 0.003    | 0.18 ± 0.003       | 0.19 ± 0.003        | 0.19 ± 0.006        | 0.17 ± 0.004        | 0.18 ± 0.002     | 0.19 ± 0.013        | 0.18 ± 0.003        |

Males, n=10-13 per group, \*, in compare to baseline group

**Supplementary Table S3. Mouse models**

| Mouse Line (C57BL/6J)                                                                                                |        | Tamoxifen | Deficiency ( <i>Ldlr</i> <sup>-/-</sup> )                      | Analyses                                                                                                                                                                             |
|----------------------------------------------------------------------------------------------------------------------|--------|-----------|----------------------------------------------------------------|--------------------------------------------------------------------------------------------------------------------------------------------------------------------------------------|
| <i>Ldlr</i> <sup>-/-</sup> <i>CsfiCre</i> <sup>+/-</sup> <i>GSK3α</i> <sup>fl/fl</sup>                               | LiαKO  | -         | -                                                              | <ul style="list-style-type: none"> <li>GSK3α/β expression</li> <li>Atherosclerosis regression (aortic sinus)</li> <li>Characterization of plaques</li> <li>Lipid profiles</li> </ul> |
| <i>Ldlr</i> <sup>-/-</sup> <i>CsfiCre</i> <sup>+/-</sup> <i>GSK3β</i> <sup>fl/fl</sup>                               | LiβKO  | -         | -                                                              |                                                                                                                                                                                      |
| <i>Ldlr</i> <sup>-/-</sup> <i>CsfiCre</i> <sup>+/-</sup> <i>GSK3α</i> <sup>fl/fl</sup> <i>GSK3β</i> <sup>fl/fl</sup> | LiαβKO | -         | -                                                              |                                                                                                                                                                                      |
| <i>Ldlr</i> <sup>-/-</sup> <i>CsfiCre</i> <sup>+/-</sup> <i>GSK3α</i> <sup>fl/fl</sup>                               | LiαKO  | +         | macrophage <i>GSK3α</i> <sup>-/-</sup>                         |                                                                                                                                                                                      |
| <i>Ldlr</i> <sup>-/-</sup> <i>CsfiCre</i> <sup>+/-</sup> <i>GSK3β</i> <sup>fl/fl</sup>                               | LiβKO  | +         | macrophage <i>GSK3β</i> <sup>-/-</sup>                         |                                                                                                                                                                                      |
| <i>Ldlr</i> <sup>-/-</sup> <i>CsfiCre</i> <sup>+/-</sup> <i>GSK3α</i> <sup>fl/fl</sup> <i>GSK3β</i> <sup>fl/fl</sup> | LiαβKO | +         | macrophage <i>GSK3α</i> <sup>-/-</sup> <i>β</i> <sup>-/-</sup> |                                                                                                                                                                                      |

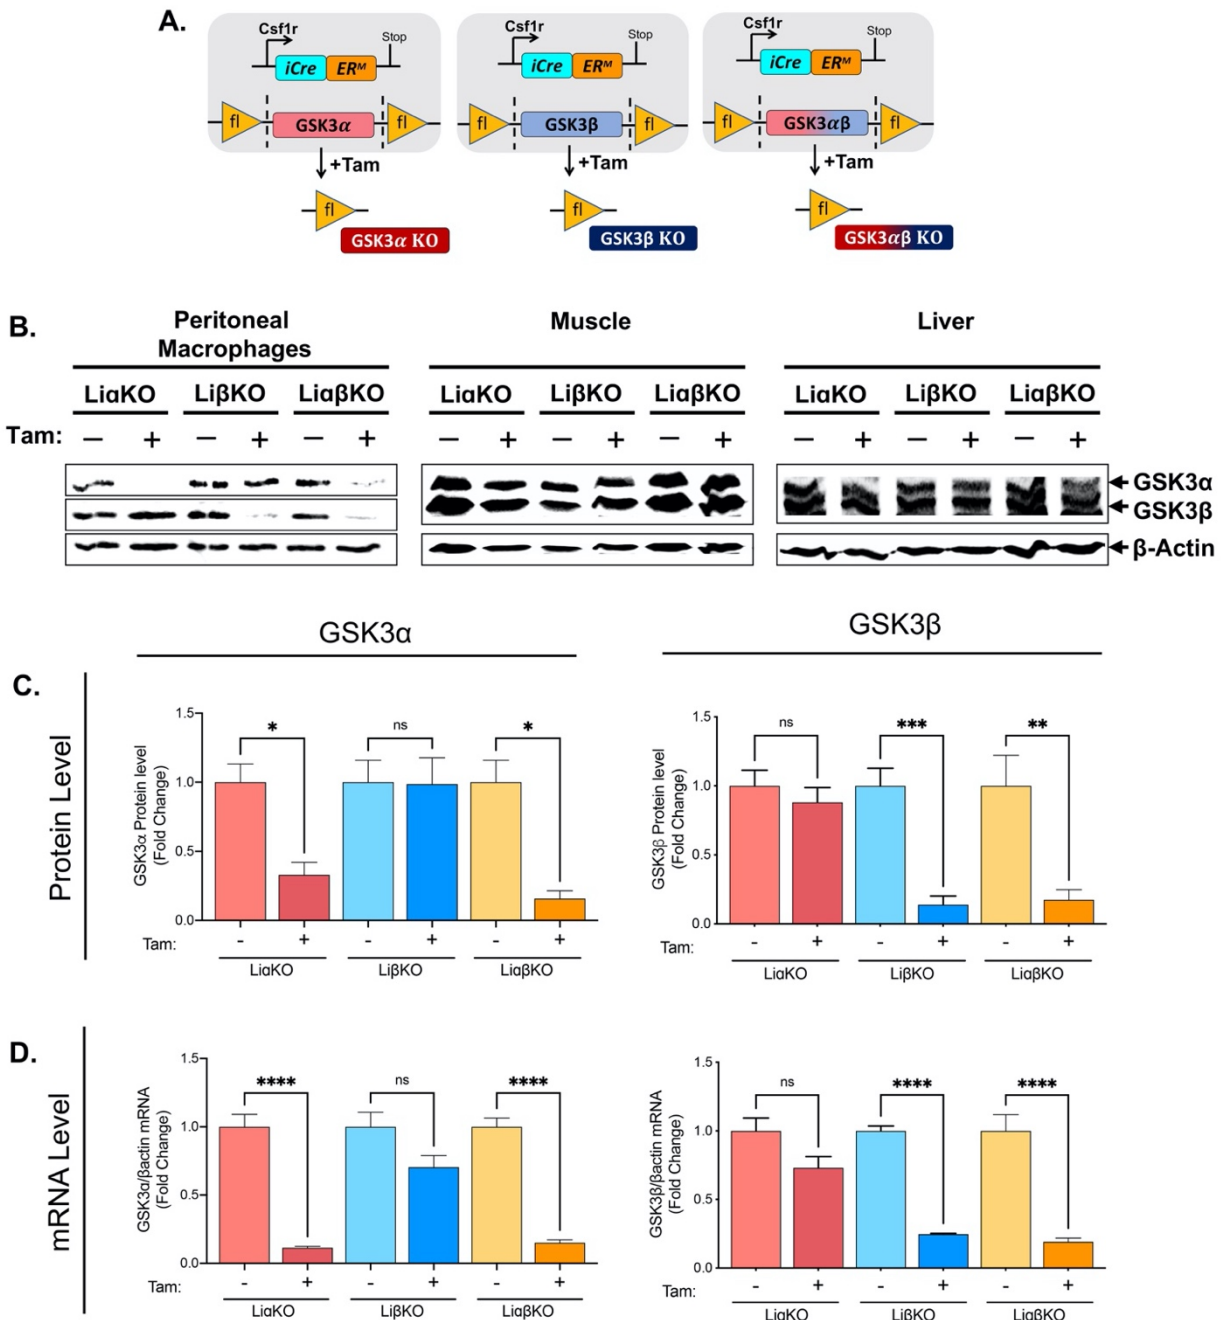

**Supplementary Figure S1. Characterization of myeloid cell-specific GSK3α and/or GSK3β inducible knockout in macrophages derived from iCre Mice.** **A.** Schematic diagram of transgenic mice crossing and tamoxifen induction of Cre activity. **B.** Whole tissue lysates from macrophages, muscle and liver from GSK3α and/or GSK3β iCre knockout mice, and controls were resolved by SDS-PAGE and probed for GSK3α and GSK3β protein. Quantified GSK3α and GSK3β **C.** protein levels and **D.** mRNA levels in macrophages determined by densitometry analysis. Results are reported as the fold change relative to non tamoxifen treatment. n=4; mean ± SEM; \*p<0.05, \*\*p<0.01, \*\*\*p<0.001, \*\*\*\*p<0.0001. Tam, tamoxifen.

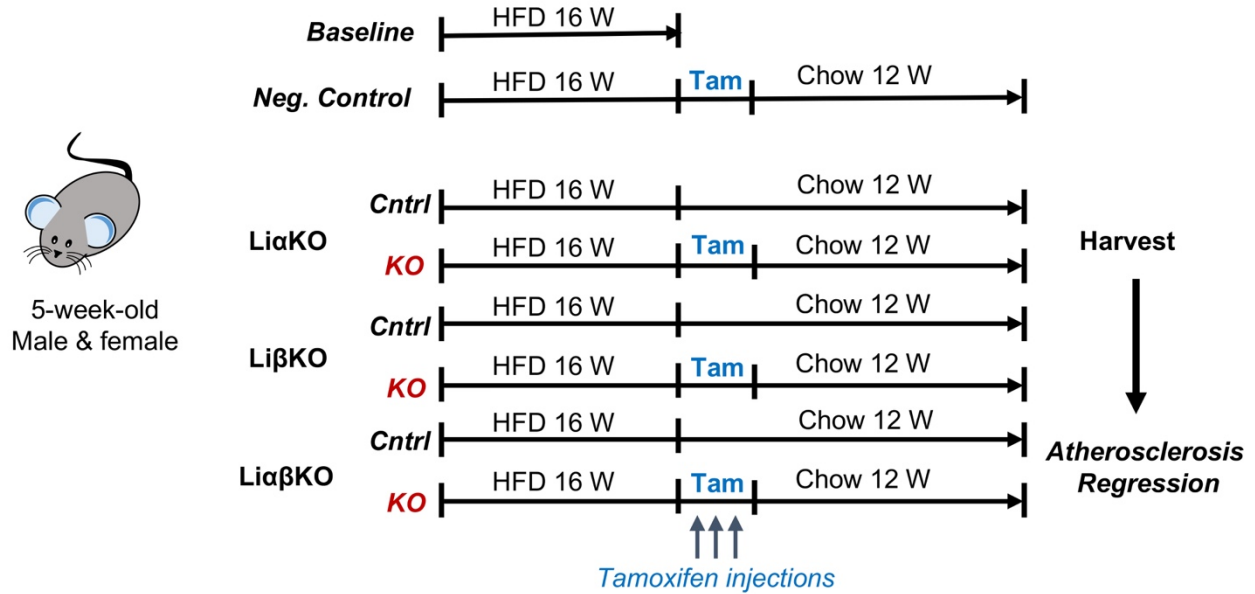

**Experimental Mice: (n=9-13 each group)**

**Baseline** ( $Ldlr^{-/-}$   $Csf1riCre^{+/-}$   $GSK3\alpha^{fl/fl}/\beta^{fl/fl}/\alpha^{fl/fl}\beta^{fl/fl}$ )  
**Neg. Control** ( $Ldlr^{-/-}$   $Csf1riCre^{-/-}$   $GSK3\alpha^{fl/fl}/\beta^{fl/fl}/\alpha^{fl/fl}\beta^{fl/fl}$ )  
**LiaKO** ( $Ldlr^{-/-}$   $Csf1riCre^{+/-}$   $GSK3\alpha^{fl/fl}$ )  
**LiβKO** ( $Ldlr^{-/-}$   $Csf1riCre^{+/-}$   $GSK3\beta^{fl/fl}$ )  
**LiaβKO** ( $Ldlr^{-/-}$   $Csf1riCre^{+/-}$   $GSK3\alpha^{fl/fl}\beta^{fl/fl}$ )

**Supplementary Figure S2. Experimental Design to study the effects of Tamoxifen triggered GSK3α and/or GSK3β deficiency on atherosclerotic plaque regression.**

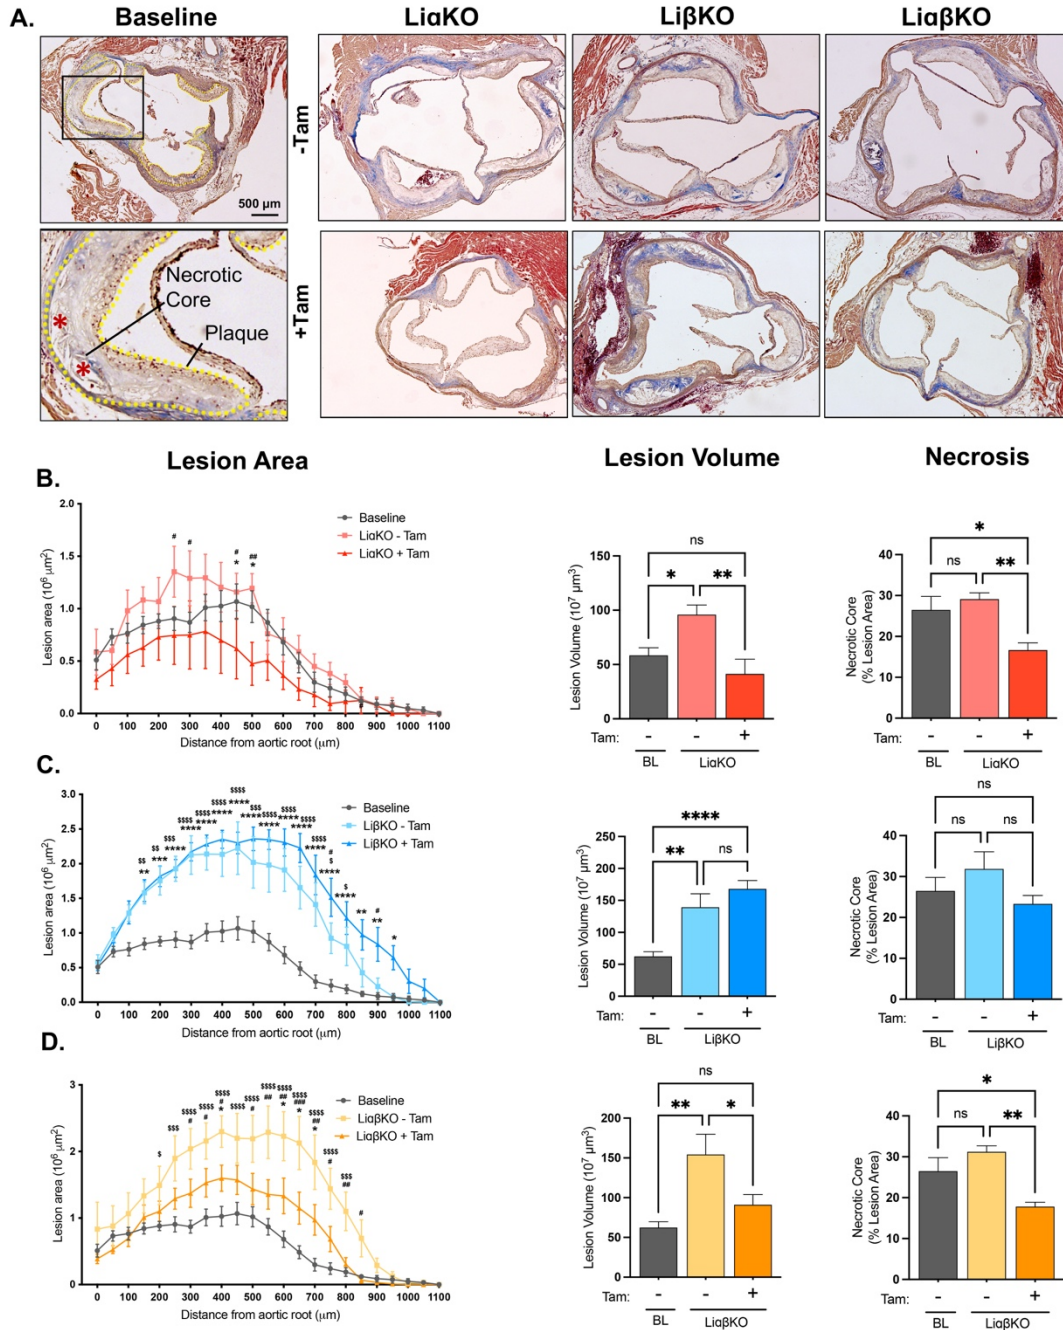

**Supplementary Figure S3. Atherosclerosis regression in Male tamoxifen induced GSK3 $\alpha$  and/or GSK3 $\beta$  deficient male Ldlr<sup>-/-</sup> mice. A.** Representative aortic root sections from high-fat diet (HFD) fed baseline, LiaKO, Li $\beta$ KO, Lia $\beta$ KO mice with and without tamoxifen (Tam) treated mice stained with Mason's trichrome. Quantification of atherosclerotic lesion area, lesion volume and % necrotic area at the aortic sinus and ascending aorta in **B.** LiaKO, **C.** Li $\beta$ KO, and **D.** Lia $\beta$ KO mice.  $n=5-8$ ; mean  $\pm$  SEM; **C.\*** is the comparison to baseline and **#** is the comparison between WT and KO ; \* $p<0.05$ , \*\* $p<0.01$ , \*\*\* $p<0.001$ , \*\*\*\*  $p<0.0001$ . Tam, tamoxifen; BL, baseline.



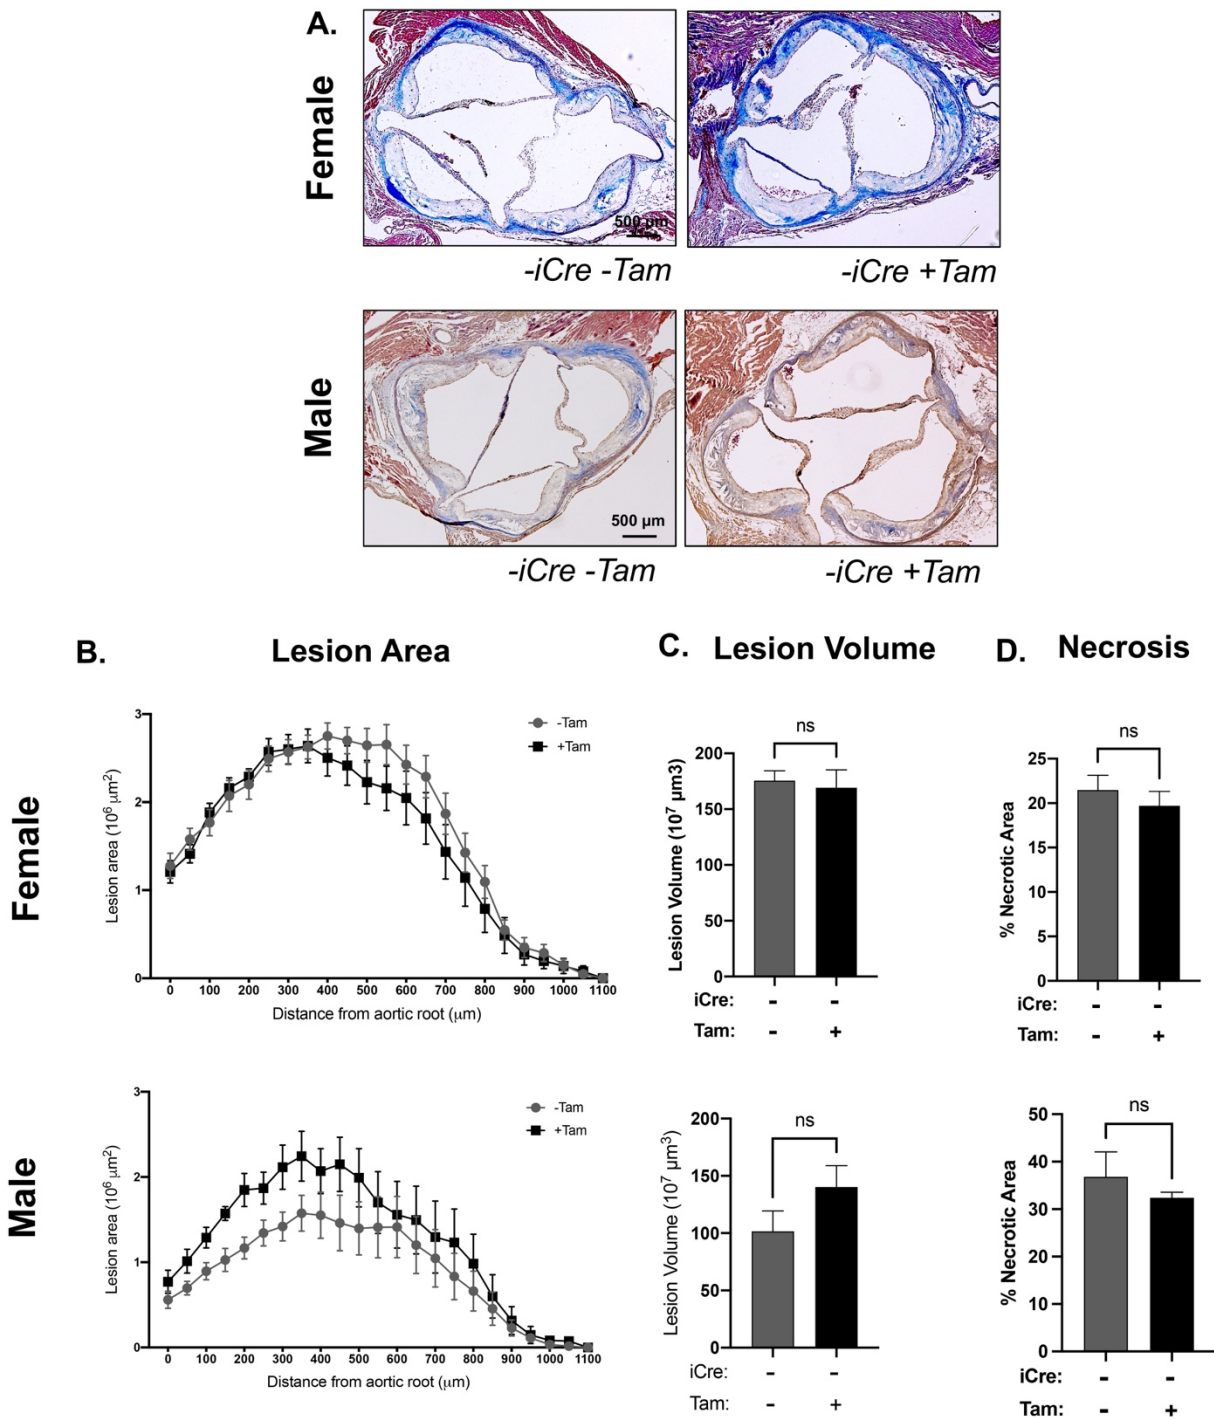

**Supplementary Figure S4. Atherosclerosis regression in tamoxifen induced *Ldlr*<sup>-/-</sup> mice.** In female **A.** Representative aortic root sections from high-fat diet (HFD) fed baseline and tamoxifen (Tam) treated negative control mice stained with Maser's trichrome. Quantification of atherosclerotic **B.** lesion area and **C.** lesion volume at the aortic sinus and ascending aorta. **D.** Quantification of % necrotic area. n=9-13; mean ± SEM. Tam, tamoxifen.

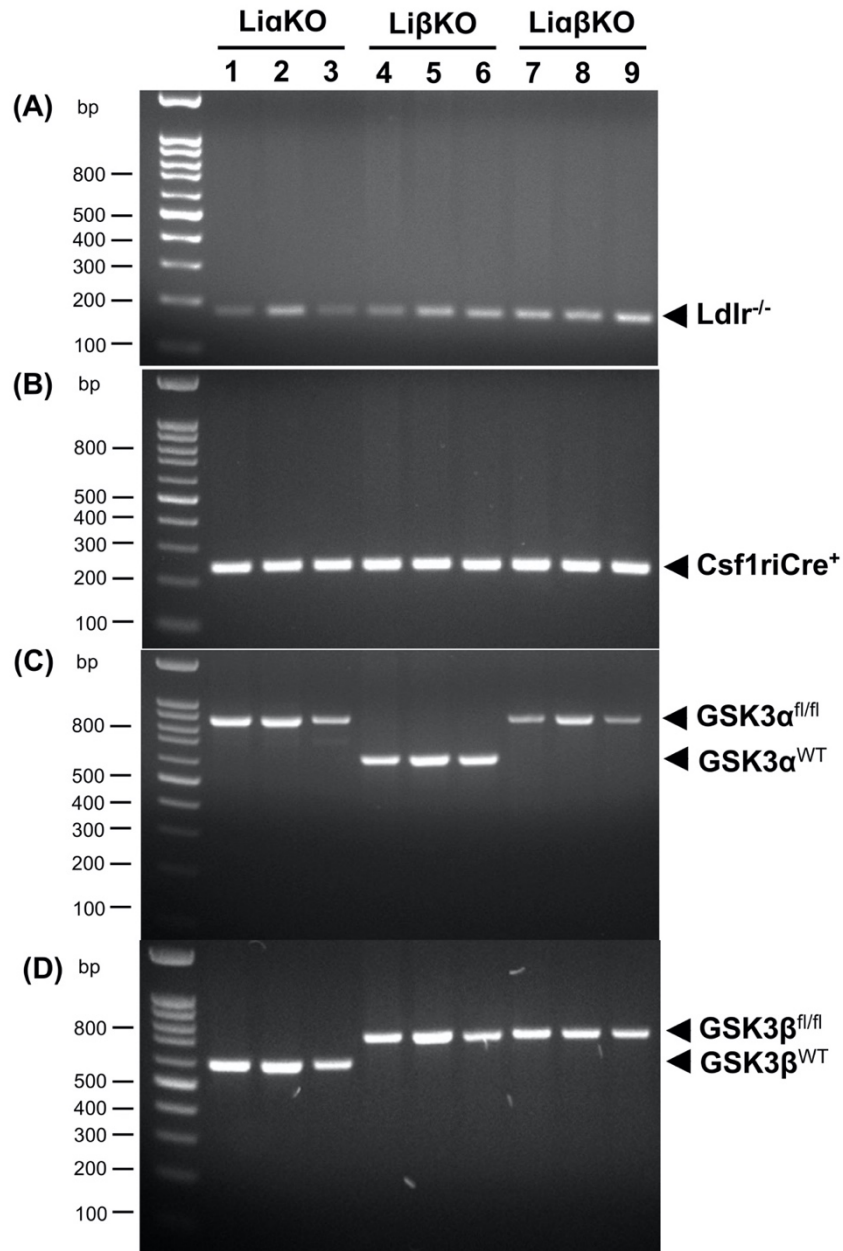

**Supplementary Figure S5. PCR analysis of mouse models(Genotype).** Genotyping of LiaKO, LiβKO, and LiaβKO mice. **A.** indicates *Ldlr*<sup>-/-</sup> (~179bp band) **B.** indicates *Csf1riCre*<sup>+</sup> (~200bp band). **C.** indicates *GSK3α*<sup>fl/fl</sup> (~750bp band) or *GSK3α*<sup>WT</sup> (~600bp band). **D.** indicates *GSK3β*<sup>fl/fl</sup> (~685bp band) or *GSK3β*<sup>WT</sup> (~585bp band)

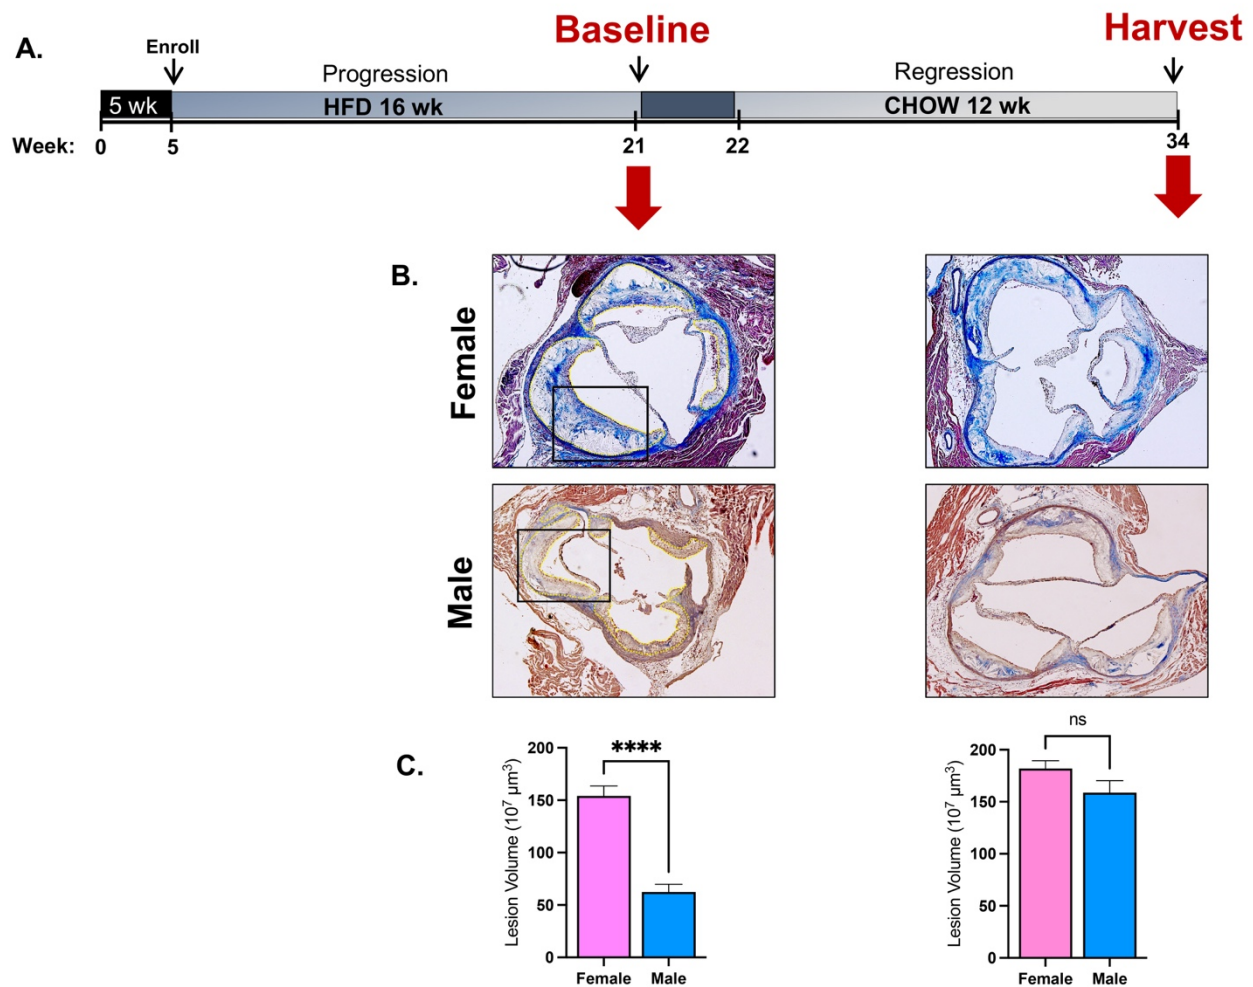

**Supplementary Figure S6: Male and female *Ldlr*<sup>-/-</sup> mice express atherosclerosis differently at aortic root.** **A.** Experimental design. **B.** Representative aortic root sections from female and male *Ldlr*<sup>-/-</sup> mice after 16 weeks of high fat diet (Baseline) and at a time harvest (end of study). **C.** Quantification of atherosclerotic lesion lesion volume at the aortic sinus and ascending aorta.



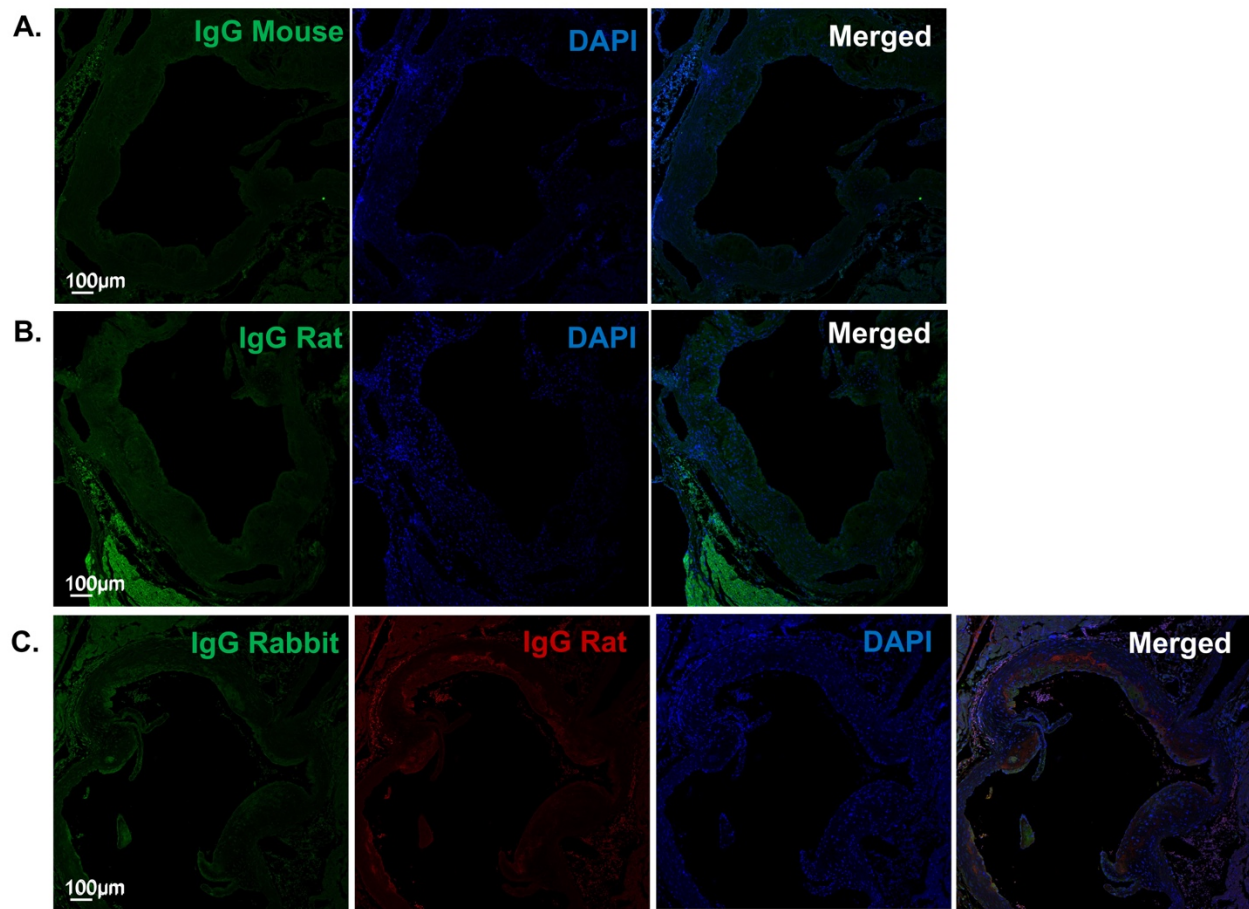

**Supplementary Figure S7. Negative Controls for immunofluorescent staining.** Representative aortic root sections stained with with pre-immune IgG antibodies to control for non-specific binding. Representative images of control IgG immunofluorescent staining and specific secondary antibody staining for **A.** anti-mouse, **B.** anti-rat, **C.** co-stained anti-rabbit and anti-rat. DAPI nuclear counterstaining is shown in blue.
